# Supplementary material for: Comprehensive adjusted outcome data are needed to assess the impact of immune checkpoint inhibitors in cancer patients with COVID‐19: Results of a systematic review and meta‐analysis
Source: PubMed Central journal article supplement — Rev Med Virol. 2022 Apr 13;32(5):e2352. doi: 10.1002/rmv.2352 (PMC9111045; doi:10.1002/rmv.2352), 2022-04-13
Supplement: RMV-32-0-s004.pdf [file RMV-32-0-s004.pdf]

**Supplementary Table 1. Newcastle-Ottawa quality of assessment scores**

| Study<br>[Author(y) <sup>ref</sup> ] | Selection                                                         |                                                 |                                          |                                                    | Comparability              |                                      | Outcome                              |                                    | Adequacy of<br>Follow-up    | Total              |
|--------------------------------------|-------------------------------------------------------------------|-------------------------------------------------|------------------------------------------|----------------------------------------------------|----------------------------|--------------------------------------|--------------------------------------|------------------------------------|-----------------------------|--------------------|
|                                      | Exposed Cohort<br>Representative or<br>Somewhat<br>Representative | Selection Non-<br>Exposed<br>Cohort<br>Adequate | Ascertainment<br>of Exposure<br>Adequate | Outcome of<br>Interest Not<br>Present at<br>Outset | Control for<br>Cancer Type | Control for<br>Additional<br>Factors | Adequate<br>Assessment<br>of Outcome | Follow-up<br>Long Enough<br>(≥30d) | Complete or<br>adequate f/u | Number of<br>Stars |
| Zhang H ('20) <sup>73</sup>          | Yes                                                               | Yes                                             | Yes                                      | Yes                                                | Yes                        | Yes                                  | Yes                                  | Yes                                | Yes                         | 9                  |
| Robilotti ('20) <sup>63</sup>        | Yes                                                               | Yes                                             | Yes                                      | Yes                                                | Yes                        | Yes                                  | Yes                                  | Yes                                | Yes                         | 9                  |
| Dai ('20) <sup>41</sup>              | Yes                                                               | Yes                                             | Yes                                      | Yes                                                | Yes                        | Yes                                  | Yes                                  | No                                 | Yes                         | 8                  |
| Zhang, L ('20) <sup>74</sup>         | Yes                                                               | Yes                                             | Yes                                      | Yes                                                | Yes                        | Yes                                  | Yes                                  | No                                 | Yes                         | 8                  |
| Kalinsky ('20) <sup>51</sup>         | Yes                                                               | Yes                                             | Yes                                      | Yes                                                | Yes                        | Yes                                  | Yes                                  | No                                 | Yes                         | 8                  |
| Klebanov ('21) <sup>52</sup>         | Yes                                                               | Yes                                             | Yes                                      | Yes                                                | Yes                        | Yes                                  | Yes                                  | No                                 | Yes                         | 8                  |
| Lee ('20) <sup>54</sup>              | Yes                                                               | Yes                                             | Yes                                      | Yes                                                | Yes                        | Yes                                  | Yes                                  | No                                 | Yes                         | 8                  |
| Luo ('20) <sup>55</sup>              | Yes                                                               | Yes                                             | Yes                                      | Yes                                                | Yes                        | Yes                                  | Yes                                  | No                                 | Yes                         | 8                  |
| Nakamura ('20) <sup>58</sup>         | Yes                                                               | Yes                                             | Yes                                      | Yes                                                | Yes                        | Yes                                  | Yes                                  | No                                 | Yes                         | 8                  |
| Nichetti ('20) <sup>59</sup>         | Yes                                                               | Yes                                             | Yes                                      | Yes                                                | Yes                        | Yes                                  | Yes                                  | No                                 | Yes                         | 8                  |
| Trapani ('20) <sup>69</sup>          | Yes                                                               | Yes                                             | Yes                                      | Yes                                                | Yes                        | Yes                                  | Yes                                  | No                                 | Yes                         | 8                  |
| Wang ('20) <sup>70</sup>             | Yes                                                               | Yes                                             | Yes                                      | Yes                                                | Yes                        | Yes                                  | Yes                                  | No                                 | Yes                         | 8                  |
| Jee ('20) <sup>50</sup>              | Yes                                                               | Yes                                             | Yes                                      | Yes                                                | Yes                        | No                                   | Yes                                  | No                                 | Yes                         | 7                  |
| Lara ('20) <sup>53</sup>             | Yes                                                               | Yes                                             | Yes                                      | Yes                                                | Yes                        | Yes                                  | Yes                                  | No                                 | UC                          | 7                  |
| Sng ('20) <sup>67</sup>              | Yes                                                               | Yes                                             | Yes                                      | Yes                                                | Yes                        | Yes                                  | Yes                                  | No                                 | UC                          | 7                  |
| Yarza ('20) <sup>71</sup>            | Yes                                                               | Yes                                             | Yes                                      | Yes                                                | Yes                        | Yes                                  | Yes                                  | No                                 | UC                          | 7                  |
| Calles ('20) <sup>39</sup>           | Yes                                                               | Yes                                             | Yes                                      | Yes                                                | No                         | No                                   | Yes                                  | Yes                                | Yes                         | 7                  |
| Di Cosimo ('21) <sup>43</sup>        | Yes                                                               | Yes                                             | Yes                                      | Yes                                                | No                         | No                                   | Yes                                  | Yes                                | Yes                         | 7                  |
| Singh ('20) <sup>66</sup>            | Yes                                                               | Yes                                             | Yes                                      | Yes                                                | No                         | No                                   | Yes                                  | Yes                                | Yes                         | 7                  |
| Crolley ('20) <sup>40</sup>          | Yes                                                               | Yes                                             | Yes                                      | Yes                                                | No                         | No                                   | Yes                                  | Yes                                | UC                          | 6                  |
| Grivas ('21) <sup>48</sup>           | Yes                                                               | Yes                                             | Yes                                      | Yes                                                | No                         | No                                   | Yes                                  | Yes                                | UC                          | 6                  |
| Mehta, A ('20) <sup>31</sup>         | Yes                                                               | Yes                                             | Yes                                      | Yes                                                | No                         | No                                   | Yes                                  | Yes                                | UC                          | 6                  |
| Pinato ('20) <sup>61</sup>           | Yes                                                               | Yes                                             | Yes                                      | Yes                                                | No                         | No                                   | Yes                                  | Yes                                | UC                          | 6                  |
| Pinto ('20) <sup>62</sup>            | Yes                                                               | Yes                                             | Yes                                      | Yes                                                | No                         | No                                   | Yes                                  | Yes                                | UC                          | 6                  |
| Russell ('20) <sup>65</sup>          | Yes                                                               | Yes                                             | Yes                                      | Yes                                                | No                         | No                                   | Yes                                  | Yes                                | UC                          | 6                  |
| Gonzalez-Cao ('20) <sup>46</sup>     | Yes                                                               | Yes                                             | Yes                                      | Yes                                                | Yes                        | No                                   | Yes                                  | No                                 | UC                          | 6                  |
| Hanna ('20) <sup>49</sup>            | Yes                                                               | Yes                                             | Yes                                      | Yes                                                | Yes                        | No                                   | Yes                                  | No                                 | UC                          | 6                  |
| Nie ('20) <sup>60</sup>              | Yes                                                               | Yes                                             | Yes                                      | Yes                                                | Yes                        | No                                   | Yes                                  | No                                 | UC                          | 6                  |
| Rogado ('20) <sup>64</sup>           | Yes                                                               | Yes                                             | Yes                                      | Yes                                                | Yes                        | No                                   | Yes                                  | No                                 | UC                          | 6                  |
| Albiges ('20) <sup>36</sup>          | Yes                                                               | Yes                                             | Yes                                      | Yes                                                | No                         | No                                   | Yes                                  | No                                 | Yes                         | 6                  |
| Yu ('20) <sup>73</sup>               | Yes                                                               | Yes                                             | Yes                                      | Yes                                                | No                         | No                                   | Yes                                  | No                                 | Yes                         | 6                  |
| Angelis ('20) <sup>37</sup>          | Yes                                                               | Yes                                             | Yes                                      | Yes                                                | No                         | No                                   | Yes                                  | No                                 | UC                          | 5                  |
| Assad ('20) <sup>40</sup>            | Yes                                                               | Yes                                             | Yes                                      | Yes                                                | No                         | No                                   | Yes                                  | No                                 | UC                          | 5                  |
| De Joode ('20) <sup>42</sup>         | Yes                                                               | Yes                                             | Yes                                      | Yes                                                | No                         | No                                   | Yes                                  | No                                 | UC                          | 5                  |
| Fillmore ('20) <sup>44</sup>         | Yes                                                               | Yes                                             | Yes                                      | Yes                                                | No                         | No                                   | Yes                                  | No                                 | UC                          | 5                  |
| Fuentes-Antras ('20) <sup>45</sup>   | Yes                                                               | Yes                                             | Yes                                      | Yes                                                | No                         | No                                   | Yes                                  | No                                 | UC                          | 5                  |
| Garassino ('20) <sup>35</sup>        | Yes                                                               | Yes                                             | Yes                                      | Yes                                                | No                         | No                                   | Yes                                  | No                                 | UC                          | 5                  |
| Goudsmit ('21) <sup>48</sup>         | Yes                                                               | Yes                                             | Yes                                      | Yes                                                | No                         | No                                   | Yes                                  | No                                 | UC                          | 5                  |
| Mandala ('20) <sup>56</sup>          | Yes                                                               | Yes                                             | Yes                                      | Yes                                                | No                         | No                                   | Yes                                  | No                                 | UC                          | 5                  |
| Mehta, V ('20) <sup>57</sup>         | Yes                                                               | Yes                                             | Yes                                      | Yes                                                | No                         | No                                   | Yes                                  | No                                 | UC                          | 5                  |
| Stroppa ('20) <sup>68</sup>          | Yes                                                               | Yes                                             | Yes                                      | Yes                                                | No                         | No                                   | Yes                                  | No                                 | UC                          | 5                  |
| Wood ('20) <sup>32</sup>             | Yes                                                               | Yes                                             | Yes                                      | Yes                                                | No                         | No                                   | Yes                                  | No                                 | UC                          | 5                  |

UC – unclear. Please refer to supplemental methods for details regarding Newcastle-Ottawa quality of assessment scores.
