# Supplementary material for: Comprehensive adjusted outcome data are needed to assess the impact of immune checkpoint inhibitors in cancer patients with COVID‐19: Results of a systematic review and meta‐analysis
Source: PubMed Central journal article supplement — Rev Med Virol. 2022 Apr 13;32(5):e2352. doi: 10.1002/rmv.2352 (PMC9111045; doi:10.1002/rmv.2352), 2022-04-13
Supplement: RMV-32-0-s008.pdf [file RMV-32-0-s008.pdf]

| <b>Supplementary Table 4. GRADE assessment of certainty of evidence</b> |               |                                         |                                                                       |                                                     |                                                     |                                           |
|-------------------------------------------------------------------------|---------------|-----------------------------------------|-----------------------------------------------------------------------|-----------------------------------------------------|-----------------------------------------------------|-------------------------------------------|
| Outcome                                                                 | Overall Grade | Risk of Bias (% of studies with NOS <7) | Inconsistency (I <sup>2</sup> Ranges for unadjusted-adjusted studies) | Indirectness (% of studies examining impact of ICI) | Imprecision (% of studies with <10 patients on ICI) | Publication Bias (p-value on Eggers plot) |
| Mortality                                                               | VERY LOW      | Downgrade                               | Downgrade                                                             | Downgrade                                           | Downgrade                                           | Do Not Downgrade                          |
|                                                                         |               | 61%                                     | 0-42%                                                                 | 11%                                                 | 63%                                                 | 0.66                                      |
| Severe Events                                                           | VERY LOW      | Downgrade                               | Downgrade                                                             | Downgrade                                           | Downgrade                                           | Do Not Downgrade                          |
|                                                                         |               | 46%                                     | 16-52%                                                                | 13%                                                 | 58%                                                 | 0.31                                      |
| Hospitalization                                                         | VERY LOW      | Downgrade                               | Downgrade                                                             | Downgrade                                           | Downgrade                                           | Do Not Downgrade                          |
|                                                                         |               | 47%                                     | 0-54%                                                                 | 20%                                                 | 53%                                                 | 0.19                                      |
