# Supplementary material for: Comprehensive adjusted outcome data are needed to assess the impact of immune checkpoint inhibitors in cancer patients with COVID‐19: Results of a systematic review and meta‐analysis
Source: PubMed Central journal article supplement — Rev Med Virol. 2022 Apr 13;32(5):e2352. doi: 10.1002/rmv.2352 (PMC9111045; doi:10.1002/rmv.2352), 2022-04-13
Supplement: RMV-32-0-s010.pdf [file RMV-32-0-s010.pdf]

| Supplementary Table 5. Comparison of 7 prior systematic reviews to the present analysis |                             |                                                     |                                                              |                                        |                 |                    |                                                                                                                                      |                                                                                   |                               |
|-----------------------------------------------------------------------------------------|-----------------------------|-----------------------------------------------------|--------------------------------------------------------------|----------------------------------------|-----------------|--------------------|--------------------------------------------------------------------------------------------------------------------------------------|-----------------------------------------------------------------------------------|-------------------------------|
| [Author (y) <sup>ref</sup> ]                                                            | Most recent collection date | Number of reports reviewed after duplicates removed | Provided analysis only of IT patients that had received ICIs | Number of studies analyzing an outcome |                 |                    | Provided analysis of published studies presenting the adjusted effects of IT or ICI on an outcome and the number of studies included |                                                                                   | Study provided GRADE analysis |
|                                                                                         |                             |                                                     |                                                              | Survival                               | Severe outcomes | Hospital admission | Provided analysis                                                                                                                    | Outcome and number of studies included                                            |                               |
| Li ('20) <sup>20</sup>                                                                  | 6/21/20                     | 3066                                                | No                                                           | 7                                      | NR              | NR                 | No                                                                                                                                   | NA                                                                                | No                            |
| Liu ('20) <sup>21</sup>                                                                 | 7/31/20                     | 2823                                                | No                                                           | 5                                      | NR              | NR                 | No*                                                                                                                                  | NA                                                                                | No                            |
| Park ('20) <sup>22</sup>                                                                | 7/1/20                      | 2895                                                | No                                                           | 11                                     | NR              | NR                 | No                                                                                                                                   | NA                                                                                | No                            |
| Wang ('20) <sup>23</sup>                                                                | 6/28/20                     | 208                                                 | No                                                           | 9                                      | 6               | NR                 | No                                                                                                                                   | No                                                                                | No                            |
| Yekeduz ('20) <sup>24</sup>                                                             | 9/1/20                      | 3412                                                | No                                                           | 5                                      | 7               | NR                 | Yes                                                                                                                                  | Severe outcome; 2 studies                                                         | No                            |
| Zhang ('20) <sup>25</sup>                                                               | 6/2/20                      | 2547                                                | No                                                           | 6                                      | NR              | NR                 | Yes <sup>†</sup>                                                                                                                     | Survival; 3 studies                                                               | No                            |
| Lazarus ('21) <sup>26</sup>                                                             | 2/27/21                     | 1172                                                | Yes                                                          | 8                                      | 6               | 5                  | Yes                                                                                                                                  | Survival; 4 studies<br>Severe outcome; 3 studies<br>Hospital admission; 1 study   | Yes                           |
| Qian ('21) <sup>27</sup>                                                                | 1/4/21                      | 1133                                                | Yes                                                          | 11                                     | 8               | 5                  | No                                                                                                                                   | NA                                                                                | No                            |
| Present analysis (Minkove et al.)                                                       | 5/1/21                      | 8259                                                | Yes                                                          | 38                                     | 24              | 15                 | Yes                                                                                                                                  | Survival; 8 studies<br>Severe outcome; 5 studies<br>Hospital admission; 2 studies | Yes                           |

\* – did analysis of studies providing adjusted effects of chemotherapy on outcome but insufficient studies to assess IT; <sup>†</sup> – presented MV analysis of survival for 3 studies presenting individual patient data; NA – not applicable; NR – not reported.
