# Supplementary material for: Comprehensive adjusted outcome data are needed to assess the impact of immune checkpoint inhibitors in cancer patients with COVID‐19: Results of a systematic review and meta‐analysis
Source: PubMed Central journal article supplement — Rev Med Virol. 2022 Apr 13;32(5):e2352. doi: 10.1002/rmv.2352 (PMC9111045; doi:10.1002/rmv.2352), 2022-04-13
Supplement: RMV-32-0-s011.pdf [file RMV-32-0-s011.pdf]

| Supplementary Table 3. Patient numbers and data for sensitivity analyses |                            |                                                                |                                 |                                              |                                        |                                                        |
|--------------------------------------------------------------------------|----------------------------|----------------------------------------------------------------|---------------------------------|----------------------------------------------|----------------------------------------|--------------------------------------------------------|
| Study [Author(y) <sup>ref</sup> ]                                        | Number of non-ICI patients | Total number of ICI patients (ICI alone or with other therapy) | Number of patients on ICI alone | Number of patients on ICI with other therapy | Time window within which ICI was given | Study enrollment potentially overlapping other studies |
| Albiges ('20) <sup>36</sup>                                              | 159                        | 19                                                             | NR                              | NR                                           | 90d                                    | No                                                     |
| Angelis ('20) <sup>37</sup>                                              | 109                        | 4                                                              | 0                               | 4                                            | 90d                                    | Yes                                                    |
| Assad ('20) <sup>38</sup>                                                | 52                         | 3                                                              | 3                               | 0                                            | 30d                                    | No                                                     |
| Calles ('20) <sup>39</sup>                                               | 18                         | 5                                                              | 5                               | 0                                            | 30d                                    | No                                                     |
| Crolley ('20) <sup>40</sup>                                              | 66                         | 2                                                              | 1                               | 1                                            | NR                                     | No                                                     |
| Dai ('20) <sup>41</sup>                                                  | 99                         | 6                                                              | 2                               | 4                                            | 40d                                    | Yes                                                    |
| de Joode ('20) <sup>42</sup>                                             | 331                        | 20                                                             | NR                              | NR                                           | 30d                                    | No                                                     |
| Di Cosimo ('21) <sup>43</sup>                                            | 217*                       | 14*                                                            | 12                              | 2                                            | 18d (0-110) <sup>†</sup>               | No                                                     |
| Fillmore ('21) <sup>44</sup>                                             | 1783                       | 11                                                             | NR                              | NR                                           | 6mos                                   | No                                                     |
| Fuentes-Antras ('20) <sup>45</sup>                                       | 61                         | 12                                                             | NR                              | NR                                           | NR                                     | No                                                     |
| Garassino ('20) <sup>32</sup>                                            | 146*                       | 54*                                                            | 34                              | 20                                           | 7d (0, 17) <sup>†</sup>                | Yes                                                    |
| Gonzalez-Cao ('21) <sup>46</sup>                                         | 48                         | 22                                                             | 22                              | 0                                            | 8wks                                   | No                                                     |
| Goudsmit ('21) <sup>47</sup>                                             | 43                         | 2                                                              | 1                               | 1                                            | NR                                     | No                                                     |
| Grivas ('21) <sup>48</sup>                                               | 4728*                      | 238*                                                           | NR                              | NR                                           | 90d                                    | No                                                     |
| Hanna ('21) <sup>49</sup>                                                | 31                         | 1                                                              | 1                               | 0                                            | 16mos (0-160) <sup>†</sup>             | No                                                     |
| Jee ('21) <sup>50</sup>                                                  | 787                        | 51                                                             | NR                              | NR                                           | 90d                                    | Yes                                                    |
| Kalinsky ('20) <sup>51</sup>                                             | 26                         | 1                                                              | 0                               | 1                                            | 12d                                    | No                                                     |
| Klebanov ('21) <sup>52</sup>                                             | 213                        | 22                                                             | 20                              | 2                                            | NR                                     | No                                                     |
| Lara ('20) <sup>53</sup>                                                 | 113                        | 8                                                              | 5                               | 3                                            | 5-50d                                  | Yes                                                    |
| Lee ('20) <sup>54</sup>                                                  | 756                        | 44                                                             | NR                              | NR                                           | 28d                                    | Yes                                                    |
| Luo ('20) <sup>55</sup>                                                  | 28                         | 41                                                             | NR                              | NR                                           | 45d (4-820) <sup>†</sup>               | Yes                                                    |
| Mandala ('21) <sup>56</sup>                                              | 37                         | 52                                                             | 52                              | 0                                            | 7mos (3.2-14.9) <sup>‡</sup>           | No                                                     |
| Mehta A. ('21) <sup>28</sup>                                             | 185                        | 1                                                              | NR                              | NR                                           | NR                                     | No                                                     |
| Mehta V. ('20) <sup>57</sup>                                             | 214                        | 4                                                              | NR                              | NR                                           | NR                                     | No                                                     |
| Nakamura ('20) <sup>58</sup>                                             | 14                         | 3                                                              | 1                               | 2                                            | 200d                                   | No                                                     |
| Nichetti ('20) <sup>59</sup>                                             | 7                          | 4                                                              | 4                               | 0                                            | 13d (4-21) <sup>†</sup>                | No                                                     |
| Nie ('20) <sup>60</sup>                                                  | 41                         | 4                                                              | NR                              | NR                                           | 28d                                    | Yes                                                    |
| Pinato ('20) <sup>61</sup>                                               | 820                        | 70                                                             | NR                              | NR                                           | 28d                                    | Yes                                                    |
| Pinto ('20) <sup>62</sup>                                                | 137                        | 1                                                              | 0                               | 1                                            | 60d                                    | No                                                     |
| Robilotti ('20) <sup>63</sup>                                            | 392                        | 31                                                             | 31                              | 0                                            | 90d                                    | Yes                                                    |
| Rogado ('20) <sup>64</sup>                                               | 44                         | 1                                                              | 1                               | 0                                            | NR                                     | No                                                     |
| Russell ('20) <sup>65</sup>                                              | 150                        | 6                                                              | 6                               | 0                                            | 2y                                     | Yes                                                    |
| Singh ('20) <sup>66</sup>                                                | 80                         | 5                                                              | 3                               | 2                                            | 45d                                    | No                                                     |
| Sng ('20) <sup>67</sup>                                                  | 90                         | 4                                                              | 1                               | 3                                            | 60d                                    | No                                                     |
| Stroppa ('20) <sup>68</sup>                                              | 21                         | 4                                                              | 4                               | 0                                            | NR                                     | No                                                     |
| Trapani ('20) <sup>69</sup>                                              | 7                          | 2                                                              | 2                               | 0                                            | 14d                                    | No                                                     |
| Wang ('20) <sup>70</sup>                                                 | 11                         | 1                                                              | 0                               | 1                                            | 30d                                    | No                                                     |
| Wood ('20) <sup>29</sup>                                                 | 242                        | 3                                                              | NR                              | NR                                           | 1y                                     | Yes                                                    |
| Yarza ('20) <sup>71</sup>                                                | 55                         | 8                                                              | NR                              | NR                                           | 28d                                    | No                                                     |
| Yu ('20) <sup>72</sup>                                                   | 11                         | 1                                                              | 0                               | 1                                            | NR                                     | No                                                     |
| Zhang, H ('20) <sup>73</sup>                                             | 101                        | 6                                                              | 1                               | 5                                            | 28d                                    | No                                                     |
| Zhang, L ('20) <sup>74</sup>                                             | 27                         | 1                                                              | 0                               | 1                                            | 14d                                    | No                                                     |

NR – Not reported; d – days; mos – months; IQR – interquartile range; wks – weeks; y – year; \* – data not available for all patients for all outcomes reported in Supplementary Table 2; † – median and range; ‡ – median and interquartile range.
