# Supplementary material for: Comprehensive adjusted outcome data are needed to assess the impact of immune checkpoint inhibitors in cancer patients with COVID‐19: Results of a systematic review and meta‐analysis
Source: PubMed Central journal article supplement — Rev Med Virol. 2022 Apr 13;32(5):e2352. doi: 10.1002/rmv.2352 (PMC9111045; doi:10.1002/rmv.2352), 2022-04-13
Supplement: RMV-32-0-s012.pdf [file RMV-32-0-s012.pdf]

**Supplementary Table 2. Total numbers of non-ICI and ICI patients and the number of patients in each group either dying, with a severe outcome other than mortality, and/or with the need for hospitalization**

| Study<br>[Author(y) <sup>ref</sup> ] | Mortality        |                   |                 |           | Severe Outcome Other than Mortality |                         |                     |                     | Need for Hospitalization |                      |              |                  |
|--------------------------------------|------------------|-------------------|-----------------|-----------|-------------------------------------|-------------------------|---------------------|---------------------|--------------------------|----------------------|--------------|------------------|
|                                      | Non-ICI<br>Total | Non-<br>ICI<br>NS | ICI<br>Total    | ICI<br>NS | Non-ICI<br>Total                    | Non-ICI with<br>Outcome | ICI<br>Total        | ICI with<br>Outcome | Non-ICI<br>Total         | Non-ICI<br>Hospital. | ICI<br>Total | ICI<br>Hospital. |
| Albiges ('20) <sup>36</sup>          | 159              | 28                | 19              | 3         | 159                                 | 44                      | 19                  | 3                   | 159                      | NR                   | 19           | NR               |
| Angelis ('20) <sup>37</sup>          | 109              | 28                | 4               | 1         | 109                                 | NR                      | 4                   | NR                  | 109                      | 97                   | 4            | 4                |
| Assad ('20) <sup>38</sup>            | 52               | 8                 | 3               | 0         | 52                                  | NR                      | 3                   | NR                  | NA                       | NA                   | NA           | NA               |
| Calles ('20) <sup>39</sup>           | 18               | 6                 | 5               | 2         | 18                                  | NR                      | 5                   | NR                  | 18                       | NR                   | 5            | NR               |
| Crolley ('20) <sup>40</sup>          | 66               | 23                | 2               | 0         | 66                                  | NR                      | 2                   | NR                  | 66                       | NR                   | 2            | NR               |
| Dai ('20) <sup>41</sup>              | 99               | 10                | 6               | 2         | 99                                  | 32 (CSE)                | 6                   | 4 (CSE)             | NA                       | NA                   | NA           | NA               |
| de Jooode ('20) <sup>42</sup>        | 331              | 112               | 20              | 2         | 331                                 | NR                      | 20                  | NR                  | NA                       | NA                   | NA           | NA               |
| Di Cosimo ('21) <sup>43</sup>        | 211 <sup>*</sup> | 76                | 11 <sup>†</sup> | 5         | 202 <sup>‡</sup>                    | 10 (ICU)                | 14                  | 2 (ICU)             | 215 <sup>§</sup>         | 156                  | 14           | 9                |
| Fillmore ('21) <sup>44</sup>         | 1783             | 249               | 11              | 2         | 1783                                | NR                      | 11                  | NR                  | 1783                     | NR                   | 11           | NR               |
| Fuentes-Antras ('20) <sup>45</sup>   | 61               | 13                | 12              | 5         | 61                                  | NR                      | 12                  | NR                  | NA                       | NA                   | NA           | NA               |
| Garassino ('20) <sup>32</sup>        | 139 <sup>¶</sup> | 50                | 52 <sup>#</sup> | 16        | 41 <sup>@</sup>                     | 21                      | 17 <sup>&amp;</sup> | 10                  | 146                      | 110                  | 54           | 42               |
| Gonzalez-Cao ('21) <sup>46</sup>     | 48               | 14                | 22              | 8         | 48                                  | 26 (CSE)                | 22                  | 12 (CSE)            | 48                       | 32                   | 22           | 17               |
| Goudsmit ('21) <sup>47</sup>         | 43               | NR                | 2               | NR        | 43                                  | 15 (CSE)                | 2                   | 1 (CSE)             | 43                       | NR                   | 2            | NR               |
| Grivas ('21) <sup>48</sup>           | 4728             | 655               | 238             | 40        | 4717 <sup>**</sup>                  | 561 (RF)                | 235 <sup>##</sup>   | 17 (RF)             | 4726 <sup>@@</sup>       | 2744                 | 238          | 128              |
| Hanna ('21) <sup>49</sup>            | 31               | 7                 | 1               | 0         | 31                                  | 7(CSE)                  | 1                   | 0 (CSE)             | 31                       | 19                   | 1            | 1                |
| Jee ('21) <sup>50</sup>              | 787              | 90                | 51              | 7         | 787                                 | 140 (CSE)               | 51                  | 14 (CSE)            | NA                       | NA                   | NA           | NA               |
| Kalinsky ('20) <sup>51</sup>         | 26               | 1                 | 1               | 0         | 26                                  | NR                      | 1                   | NR                  | 26                       | 7                    | 1            | 0                |
| Klebanov ('21) <sup>52</sup>         | 213              | 61                | 22              | 9         | 213                                 | NR                      | 22                  | NR                  | 213                      | NR                   | 22           | NR               |
| Lara ('20) <sup>53</sup>             | 113              | 14                | 8               | 3         | 113                                 | 17 (CSE)                | 8                   | 3 (CSE)             | 113                      | 61                   | 8            | 5                |
| Lee ('20) <sup>54</sup>              | 756              | 216               | 44              | 10        | 756                                 | NR                      | 44                  | NR                  | 756                      | NR                   | 44           | NR               |
| Luo ('20) <sup>55</sup>              | 28               | 5                 | 41              | 11        | 28                                  | 9                       | 41                  | 15                  | 28                       | 15                   | 41           | 27               |
| Mandala ('21) <sup>56</sup>          | 37               | 2                 | 52              | 6         | 37                                  | 2                       | 52                  | 9                   | 37                       | 1                    | 52           | 7                |
| Mehta A. ('21) <sup>28</sup>         | 185              | 27                | 1               | 0         | 185                                 | NR                      | 1                   | NR                  | NA                       | NA                   | NA           | NA               |
| Mehta V. ('20) <sup>57</sup>         | 214              | 60                | 4               | 1         | 214                                 | NR                      | 4                   | NR                  | 214                      | NR                   | 4            | NR               |
| Nakamura ('20) <sup>58</sup>         | 14               | 5                 | 3               | 1         | 14                                  | 7 (RF)                  | 3                   | 2 (RF)              | NA                       | NA                   | NA           | NA               |
| Nichetti ('20) <sup>59</sup>         | 7                | 4                 | 4               | 2         | 7                                   | 1 (ICU)                 | 4                   | 0 (ICU)             | 7                        | 7                    | 4            | 3                |
| Nie ('20) <sup>60</sup>              | 41               | 10                | 4               | 1         | 41                                  | NR                      | 4                   | NR                  | 41                       | NR                   | 4            | NR               |
| Pinato ('20) <sup>61</sup>           | 820              | 281               | 70              | 18        | 820                                 | NR                      | 70                  | NR                  | 820                      | NR                   | 70           | NR               |

|                               |     |    |    |    |     |          |    |          |     |     |    |    |
|-------------------------------|-----|----|----|----|-----|----------|----|----------|-----|-----|----|----|
| Pinto ('20) <sup>62</sup>     | 137 | 52 | 1  | 0  | 137 | NR       | 1  | NR       | NA  | NA  | NA | NA |
| Robilotti ('20) <sup>63</sup> | 392 | NR | 31 | NR | 392 | 73 (CSE) | 31 | 12 (CSE) | 392 | 341 | 29 | 18 |
| Rogado ('20) <sup>64</sup>    | 44  | 18 | 1  | 1  | 44  | 0 (ICU)  | 1  | 0 (ICU)  | 44  | 16  | 1  | 1  |
| Russell ('20) <sup>65</sup>   | 150 | 31 | 6  | 3  | 150 | 26 (CSE) | 6  | 2 (CSE)  | 150 | NR  | 6  | NR |
| Singh ('20) <sup>66</sup>     | 80  | 31 | 5  | 1  | 80  | 28 (ICU) | 5  | 2 (ICU)  | 80  | 68  | 5  | 5  |
| Sng ('20) <sup>67</sup>       | 90  | 39 | 4  | 2  | 90  | NR       | 4  | NR       | NA  | NA  | NA | NA |
| Stroppa ('20) <sup>68</sup>   | 21  | 9  | 4  | 0  | 21  | NR       | 4  | NR       | NA  | NA  | NA | NA |
| Trapani ('20) <sup>69</sup>   | 7   | 0  | 2  | 0  | 7   | 2 (CSE)  | 2  | 0 (CSE)  | 7   | 3   | 2  | 0  |
| Wang ('20) <sup>70</sup>      | 11  | 2  | 1  | 1  | 11  | 1 (RF)   | 1  | 1 (RF)   | NA  | NA  | NA | NA |
| Wood ('20) <sup>29</sup>      | 242 | 70 | 3  | 0  | 242 | NR       | 3  | NR       | 242 | NR  | 3  | NR |
| Yarza ('20) <sup>71</sup>     | 55  | NR | 8  | NR | 55  | 21 (RF)  | 8  | 3 (RF)   | NA  | NA  | NA | NA |
| Yu ('20) <sup>72</sup>        | 11  | 2  | 1  | 0  | 11  | 3 (CSE)  | 1  | 0 (CSE)  | NA  | NA  | NA | NA |
| Zhang, H ('20) <sup>73</sup>  | 101 | 21 | 6  | 2  | 101 | 53 (CSE) | 6  | 3 (CSE)  | NA  | NA  | NA | NA |
| Zhang, L ('20) <sup>74</sup>  | 27  | NR | 1  | NR | 27  | 14 (CSE) | 1  | 1 (CSE)  | NA  | NA  | NA | NA |

\* – mortality data not available for 6 non-ICI patients; † – mortality data not available for 3 ICI patient; ‡ – combined severe event data not available for 15 non-ICI patients; § – hospitalization data not available for 2 non-ICI patients; ¶ – mortality data not available for 7 non-ICI patient; # – mortality data not available for 2 ICI patients; @ – severe event data not available for 105 patients and severe event reported is prolonged hospitalization; & – severe event data not available for 37 ICI patients; \*\* – severe event data not available for 11 non-ICI patients; ## – severe event data not available for 3 ICI patients; @@ – hospitalization data not available for 2 non-ICI patients; NS – non-survivors; CSE – composite severe event; RF – respiratory failure; ICU – ICU admission. See methods for selection of severe events.
