# Supplementary figures and images for: Comprehensive adjusted outcome data are needed to assess the impact of immune checkpoint inhibitors in cancer patients with COVID‐19: Results of a systematic review and meta‐analysis
Source: PubMed Central journal article supplement — Rev Med Virol. 2022 Apr 13;32(5):e2352. doi: 10.1002/rmv.2352 (PMC9111045; doi:10.1002/rmv.2352), 2022-04-13

# Results - Literature Search

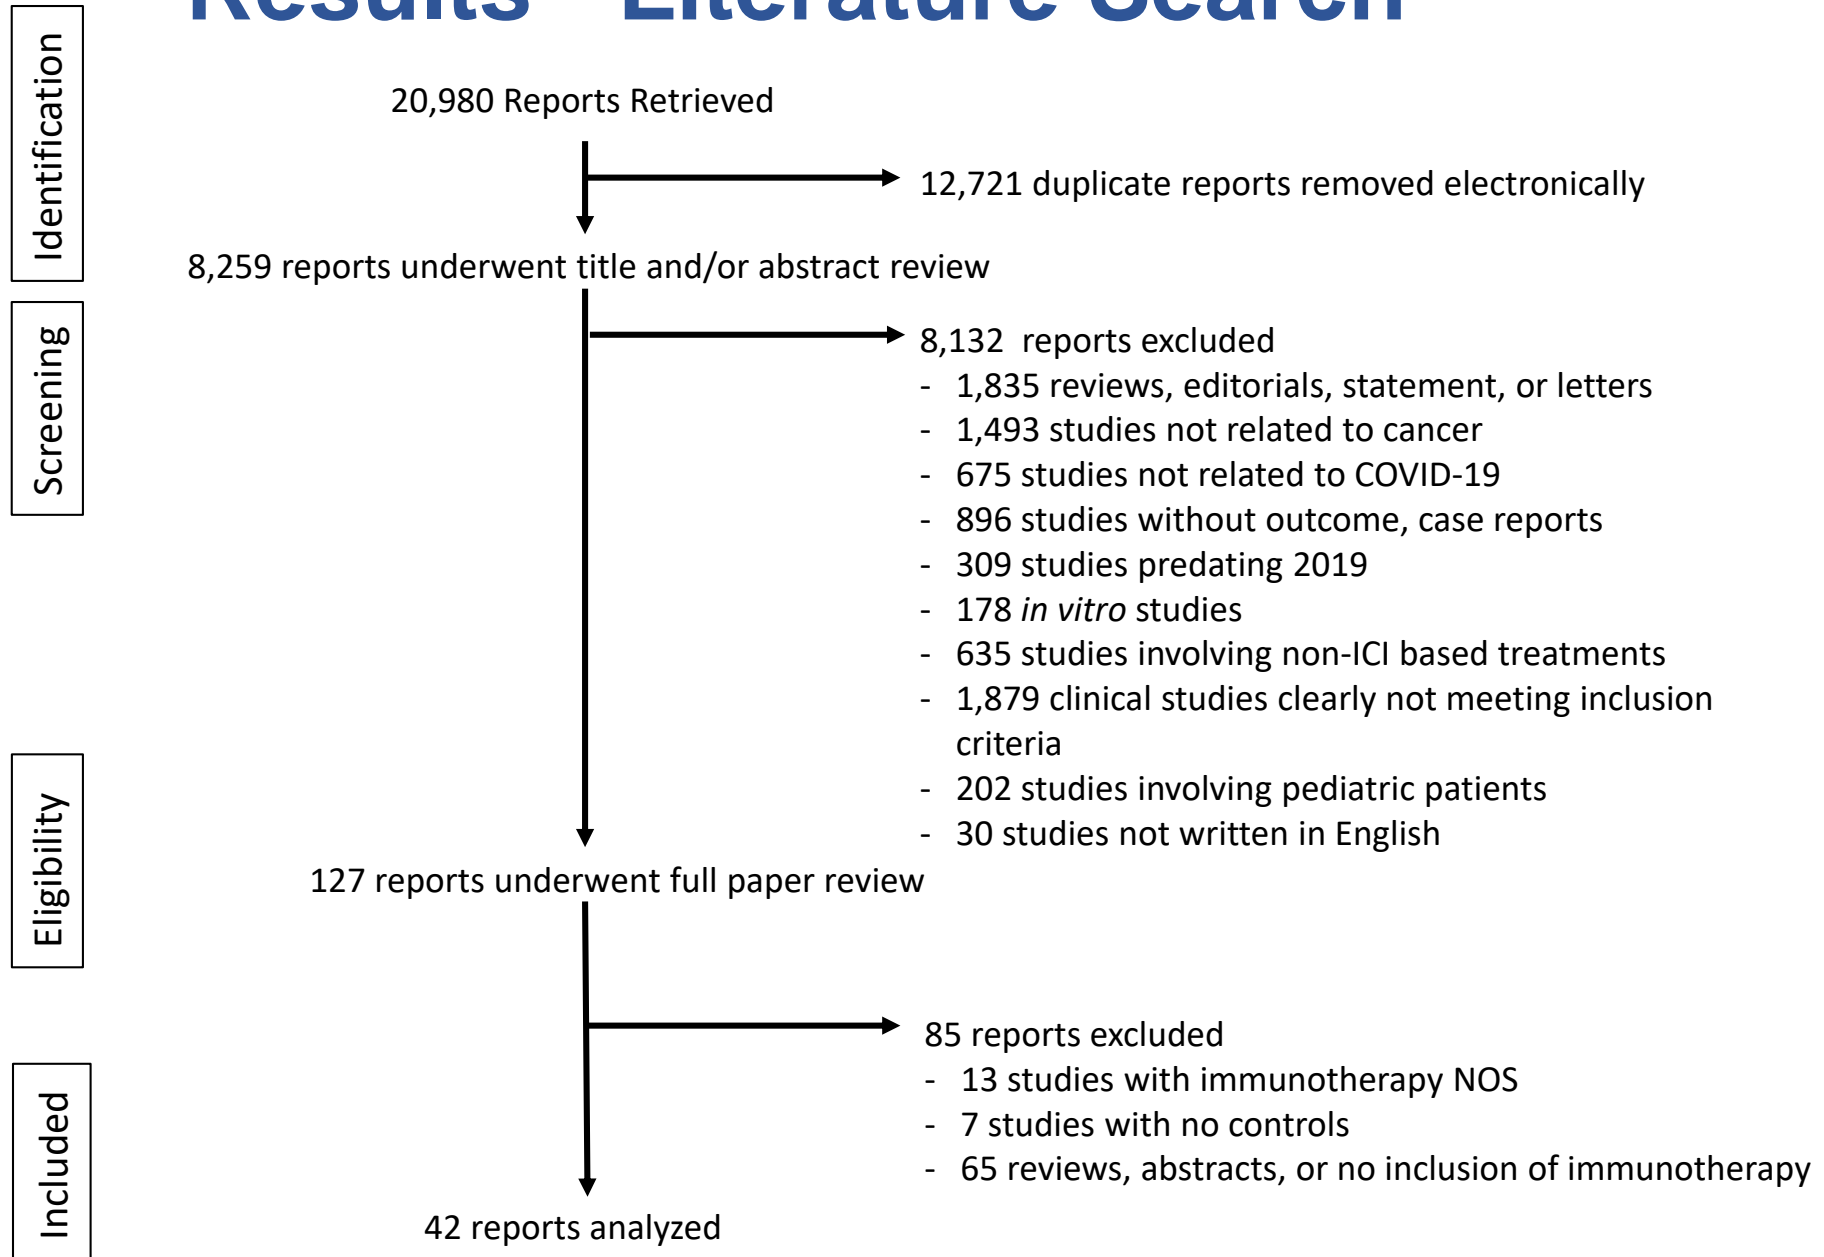

Supplement: RMV-32-0-s002.pdf [file RMV-32-0-s002.pdf]

# Supplementary Figure-2. Funnel Plots

## Mortality

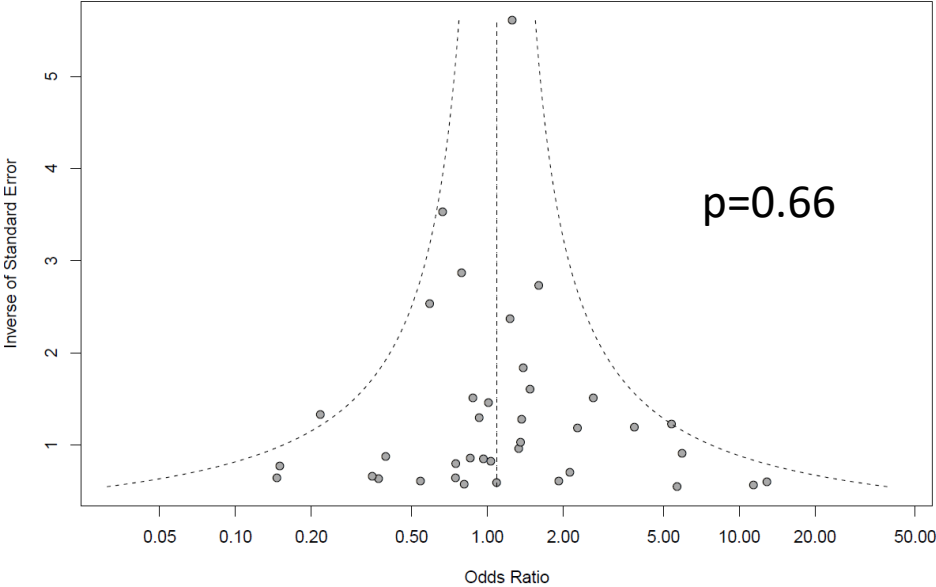

## Severe Events

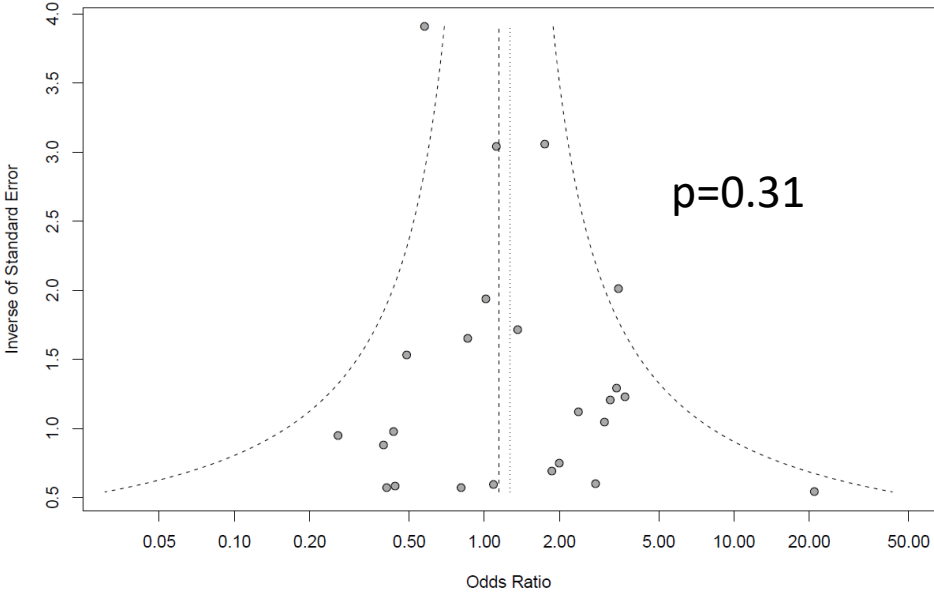

## Hospitalization

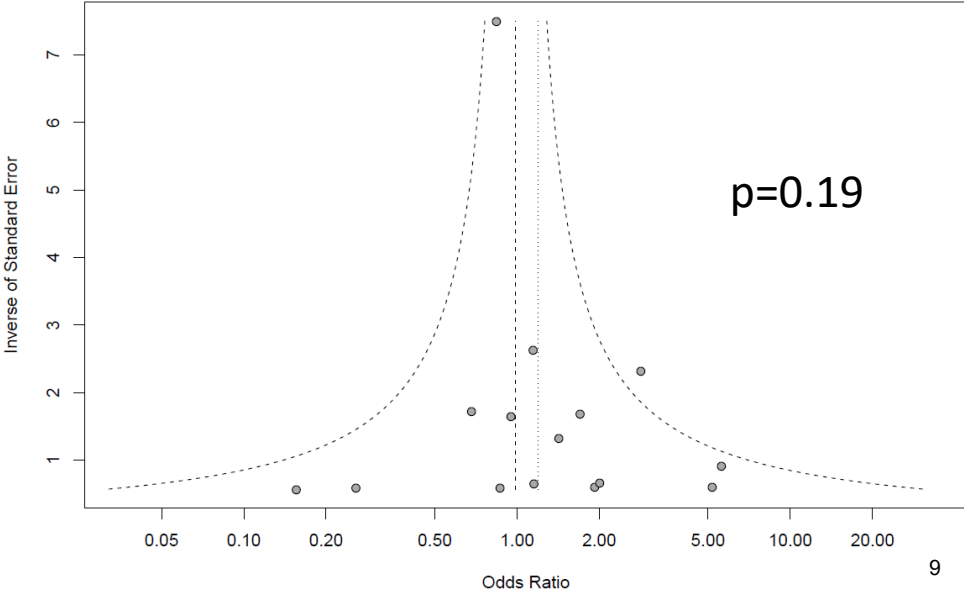

Supplement: RMV-32-0-s006.pdf [file RMV-32-0-s006.pdf]
